# Supplementary material for: Dyrk1A negatively regulates the actin cytoskeleton through threonine phosphorylation of N-WASP
Source: Oxford University Press journal article supplement (doi:10.1242/jcs.086124), 2012-01-01
Supplement: jcs086124tables1.pdf [file jcs086124tables1.pdf]

**Table S1.** List of the primers used to generate various N-WASP constructs encoding WT and truncation mutants.

### Information for DNA Constructs

| Name                 | Vector        | Enzyme Sites | Primers (Forward & Reverse)                                                      |
|----------------------|---------------|--------------|----------------------------------------------------------------------------------|
| Flag-N-WASP (WT)     | pRK5-Flag     | MluI & NotI  | 5'-ACGCGTATGAGCTCGGGCCAGCAGCC-3'<br>5'-GCGGCCGCTCAGTCTTCCCCTCATCATCATC-3'        |
| Flag-N-WASP (B-GBD)  | pRK5-Flag     | MluI & NotI  | 5'-ACGCGTAACATCTCCACACCAAAGAAAAG-3'<br>5'-GCGGCCGCTCATGGTGCTTGCCTTCGGAGTTCATT-3' |
| Xpress-N-WASP (VCA)  | pcDNA4/HisMax | EcoRI & XhoI | 5'-GAATTCGGACCATCAAGTTCCAGTCTCTCA-3'<br>5'-CTCGAGTCAGTCTTCCCCTCATCATCATC-3'      |
| EGFP-N-WASP (WT)     | pEGFP-C2      | XhoI & EcoRI | 5'-CTCGAGTATGAGCTCGGGCCAGCAGCC-3'<br>5'-GAATTCAGTCTTCCCCTCATCATCATC-3'           |
| 6xHis-N-WASP (WT)    | pET-28a(+)    | EcoRI & XhoI | 5'-GAATTCATGAGCTCGGGCCAGCAGC-3'<br>5'-CTCGAGGTCTTCCCCTCATCATCATC-3'              |
| 6xHis-N-WASP (1-463) | pET-28a(+)    | EcoRI & XhoI | 5'-GAATTCATGAGCTCGGGCCAGCAGC-3'<br>5'-CTCGAGAATTCCTGAAGTGGGCGCGG-3'              |
| 6xHis-N-WASP (1-391) | pET-28a(+)    | EcoRI & XhoI | 5'-GAATTCATGAGCTCGGGCCAGCAGC-3'<br>5'-CTCGAGACCATCAGAAGGCAGGCCAG-3'              |
| 6xHis-N-WASP (1-264) | pET-28a(+)    | EcoRI & XhoI | 5'-GAATTCATGAGCTCGGGCCAGCAGC-3'<br>5'-CTCGAGAGCTTCTACACCTCTGTTTTT-3'             |
| 6xHis-N-WASP (1-195) | pET-28a(+)    | EcoRI & XhoI | 5'-GAATTCATGAGCTCGGGCCAGCAGC-3'<br>5'-CTCGAGTAATCTCTCTTTTAGCTTTTCC-3'            |
| GST-N-WASP (B-GBD)   | pGEX-4T-1     | EcoRI & XhoI | 5'-GAATTC AACATCTCCACACCAAAGAAAAG-3'<br>5'-CTCGAGTCATGGTGCTTGCCTTCGGAGTTCATT-3'  |
