# Supplementary material for: Dyrk1A negatively regulates the actin cytoskeleton through threonine phosphorylation of N-WASP
Source: Oxford University Press journal article supplement (doi:10.1242/jcs.086124), 2012-01-01
Supplement: jcs086124tables2.pdf [file jcs086124tables2.pdf]

**Table S2.** Detailed primer sequences used for the site-directed mutagenesis of N-WASP. The mutation sites are indicated by lines. The double or triple substitution was carried out by two rounds of mutagenesis PCR with combination of the proper primers in the list.

### Information for Mutagenesis

| Name                    | Primers (Forward & Reverse)                                                                                                                                      |
|-------------------------|------------------------------------------------------------------------------------------------------------------------------------------------------------------|
| N-WASP<br>(T196A)       | 5'-GCTAAAAAGAAGAGATTAGCCAAGGCAGATATTGGAACACC-3'<br>5'-GGTGTTC AATATCTGCCTTGGCTAATCTCTCTTTTAGC-3'                                                                 |
| N-WASP<br>(T202A&S204A) | 5'-CCAAGGCAGATATTGGAGCACCAGCTAATTTCCAGCACATTGGAC-3'<br>5'-GTCCAATGTGCTGGAAATTAGCTGGTGCCTCCAATATCTGCCTTGG-3'                                                      |
| N-WASP<br>(T218A)       | 5'-GTTGGTTGGGATCCAAATGCAGGTTTGTATCTAAATAATTGGATC-3'<br>5'-GATCCAAATTATTTAGATCAAAACCTGCATTTGGATCCCAACCAAC-3'                                                      |
| N-WASP<br>(T248A&S249A) | 5'-GAGGCCAGCTTAAAGACAGAGAAGCAGCAAAAAGTTATTTATGACTTTATTG-3'<br>5'-CAATAAAGTCATAAATACTTTTGCTGCTTCTCTGTCTTTAAGCTGGGCCTC-3'                                          |
| N-WASP<br>(T259A)       | 5'-GTTATTTATGACTTTATTGAAAAAGCAGGAGGTGTAGAAGCTGTTAAAAATG-3'<br>5'-CATTTTTAACAGCTTCTACACCTCTGCTTTTTCAATAAAGTCATAAATAAC-3'                                          |
| N-WASP<br>(T196A&T202A) | 5'-GCTAAAAAGAAGAGATTAGCCAAGGCAGATATTGGAGCACCAAGTAATTTCCAGCACATTGG-3'<br>5'-CCAATGTGCTGGAAATACTTGGTGCCTCCAATATCTGCCTTGGCTAATCTCTCTCTTTTAGC-3'                     |
| N-WASP<br>(T196E)       | 5'-GAAAGGAAAAGCTAAAAAGAAGAGATTAGAAAAGGCAGATATTGGAACACCAAGTAATTTCC-3'<br>5'-GAAATACTTGGTGTTC AATATCTGCCTTTTCTAATCTCTCTTTTAGCTTTTCTTTCC-3'                         |
| N-WASP<br>(T202E)       | 5'-CCAAGGCAGATATTGGAGAACCAAGTAATTTCCAGCACATTGGAC-3'<br>5'-GTCCAATGTGCTGGAAATACTTGGTCTCCAATATCTGCCTTGG-3'                                                         |
| N-WASP<br>(T259E)       | 5'-CAAAAGTTATTTATGACTTTATTGAAAAAGAAGGAGGTGTAGAAGCTGTAAA AATGAACTC-3'<br>5'-GAGTTCATTTTTAACAGCTTCTACACCTCCTTCTTTTTCAATAAAGTCATAAA TAACTTTTG-3'                    |
| N-WASP<br>(T196E&T202E) | 5'-GAAAGGAAAAGCTAAAAAGAAGAGATTAGAAAAGGCAGATATTGGAGAACCAAGTAATTTCCAGCACATTGGAC-3'<br>5'-GTCCAATGTGCTGGAAATACTTGGTCTCCAATATCTGCCTTTTCTAATCTCTCTTTTAGCTTTTCTTTCC-3' |
